# Supplementary material for: Содержание некоторых химических элементов в организме беременных женщин
Source: Royal Society of Chemistry journal article supplement (doi:10.1039/c8dt04038a), 2004-01-01
Supplement: c8dt04038a1.pdf [file c8dt04038a1.pdf]

## **Supplementary information**

### **Janus Nanoparticles for Contrast Enhancement of T<sub>1</sub>-T<sub>2</sub> Dual Mode Magnetic Resonance Imaging**

**Kashmiri Deka,<sup>a</sup> Anupam Guleria,<sup>b</sup> Dinesh Kumar,<sup>b</sup> Jayeeta Biswas,<sup>c</sup> Saurabh Lodha,<sup>c</sup>  
Som Datta Kaushik,<sup>d</sup> Saynaz A. Choudhary,<sup>e</sup> Suman Dasgupta<sup>e</sup> and Pritam Deb<sup>\*a</sup>**

<sup>a</sup>Advanced Functional Material Laboratory, Tezpur University (Central University), Tezpur 784028, India

<sup>b</sup>Centre of Biomedical Research, SGPGIMS Campus, Lucknow 226014, India

<sup>c</sup>Department of Electrical Engineering, IIT Bombay, Mumbai 400076, India

<sup>d</sup>UGC-DAE Consortium for Scientific Research, Mumbai Centre, R-5 Shed, BARC, Mumbai 400085, India

<sup>e</sup>Department of Molecular Biology and Biotechnology, Tezpur University (Central University), Tezpur 784028, India

#### **1. X-ray diffraction analysis**

XRD pattern of the precursor MnFe<sub>2</sub>O<sub>4</sub> nanoparticles (Figure S1) confirms its face centered cubic phase (JCPDS file no. 74-2403).<sup>1</sup> XRD pattern of the synthesized MnFe<sub>2</sub>O<sub>4</sub>@MnO Janus nanosystem (Figure S1) showed peaks representing both MnO (JCPDS 75-1090) [2] and MnFe<sub>2</sub>O<sub>4</sub> crystal lattice planes. From the XRD spectra, the crystallinity was observed to be compromised to some extent. This can be attributed to the fact that all the synthesis procedures involved relatively low temperature and no calcination step was performed [3].

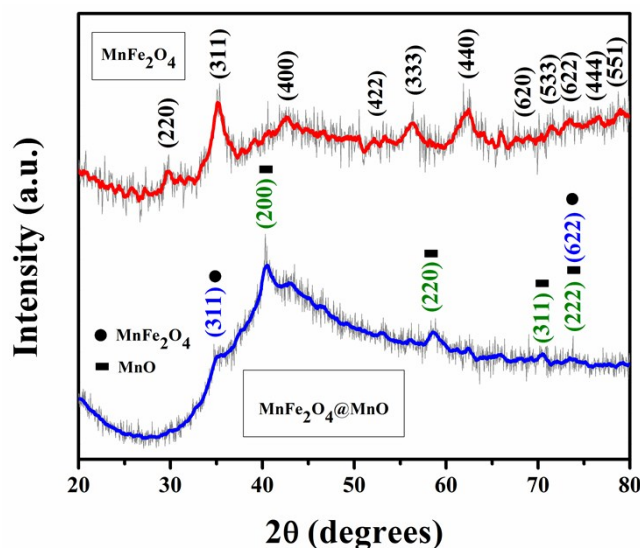

**Figure S1** XRD pattern of  $\text{MnFe}_2\text{O}_4$  nanoparticles and  $\text{MnFe}_2\text{O}_4@\text{MnO}$  Janus nanosystem

## 2. SEM analysis and elemental mapping

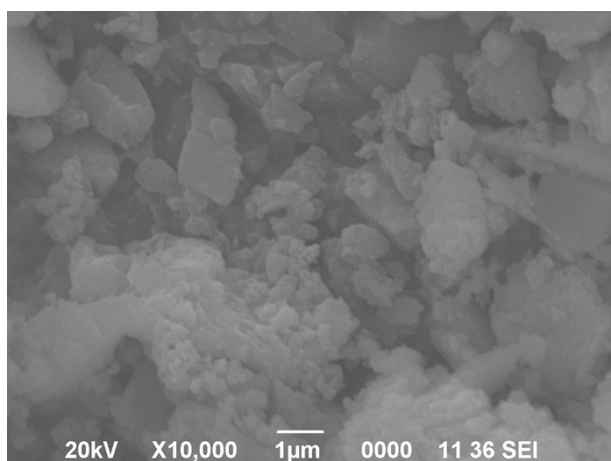

**Figure S2** SEM of  $\text{MnFe}_2\text{O}_4@\text{MnO}$  Janus nanosystem

The elemental mapping analysis shown in Figure S3 reveals the presence of Mn, Fe and O in  $\text{MnFe}_2\text{O}_4@\text{MnO}$  Janus nanosystem. It is observed that all the three elements are consistently distributed throughout the material.

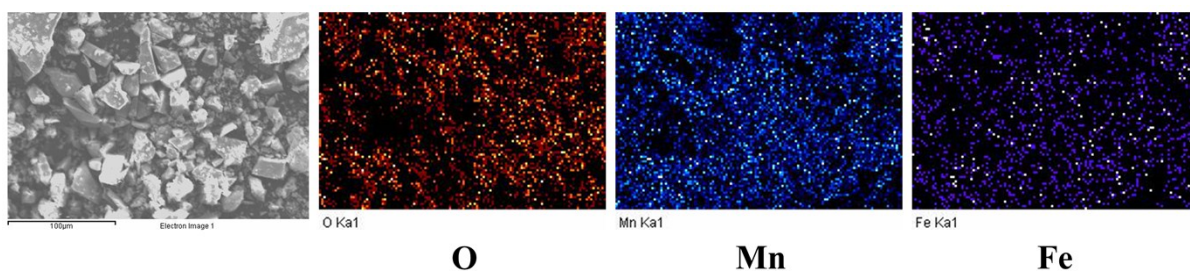

**Figure S3** Elemental mapping of  $\text{MnFe}_2\text{O}_4@\text{MnO}$  Janus nanosystem

### 3. TEM analysis of $\text{MnFe}_2\text{O}_4$ nanoparticles

TEM image of the synthesized  $\text{MnFe}_2\text{O}_4$  nanoparticles shown in Figure S4(a) exhibited spherical morphologies in the size range of 120-300 nm. A closer view (Figure S4(b)) reveals that these microspheres are actually assemblies of nanoparticles. Figure S4(c) further confirms the crystallinity of the particles and planes present in them were identified from SAED pattern (Figure S4(d)).

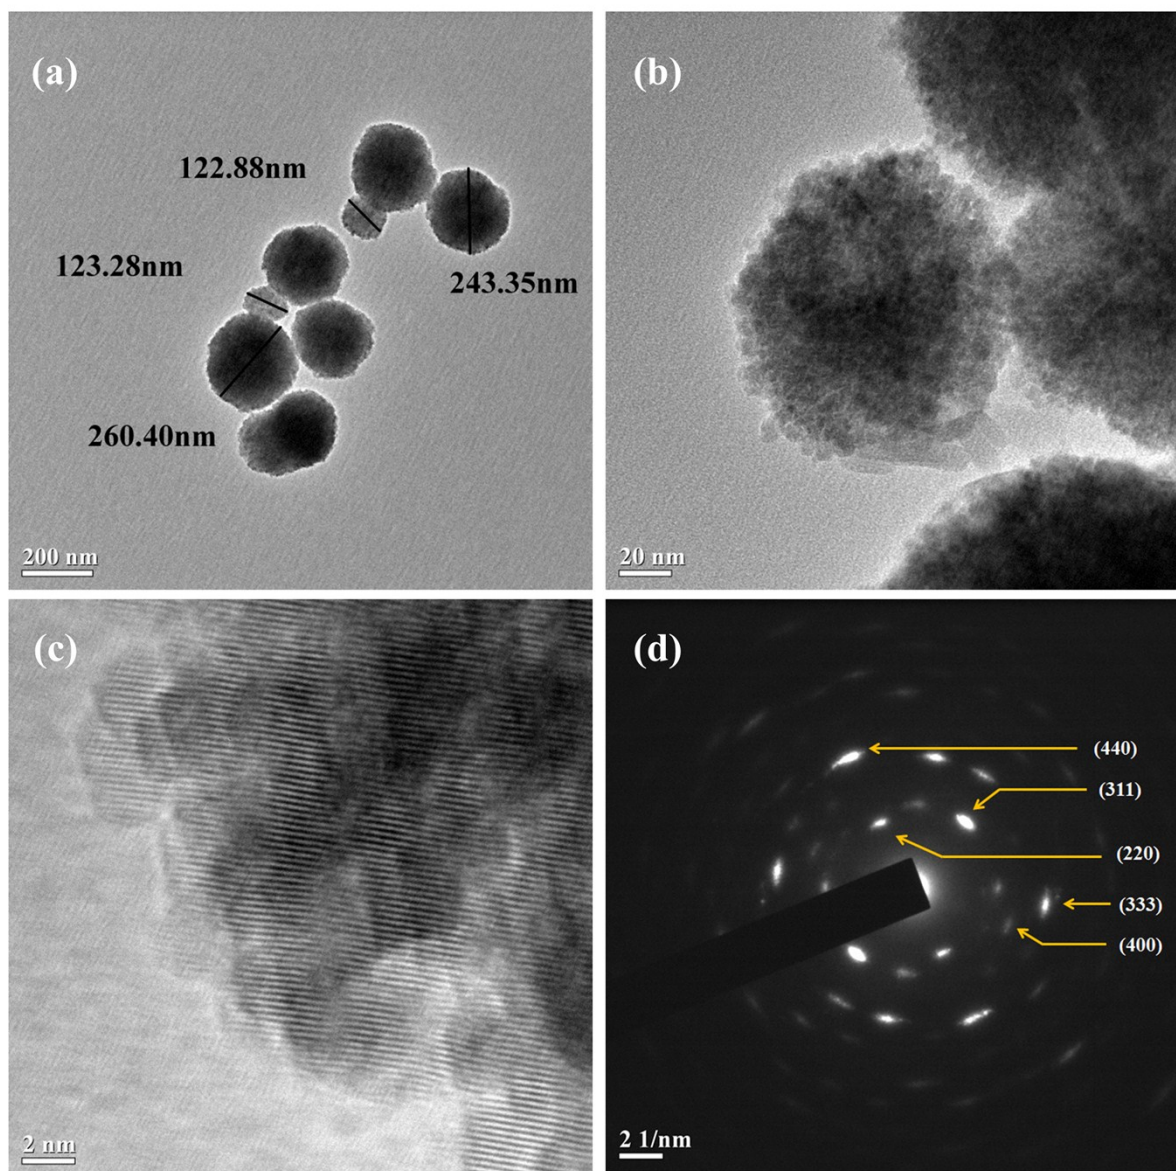

**Figure S4 (a) – (c) TEM images (d) SAED pattern of  $\text{MnFe}_2\text{O}_4$  nanoparticles**

### 4. Amount of PEG coating

The amount of PEG coated on the nanoparticles were determined through thermogravimetric analysis and it was found to be 21%.

## 5. Interaction of the PEG stabilized Janus nanoparticles with cell lines

### 5.1 Interaction with HEK 293 cell line

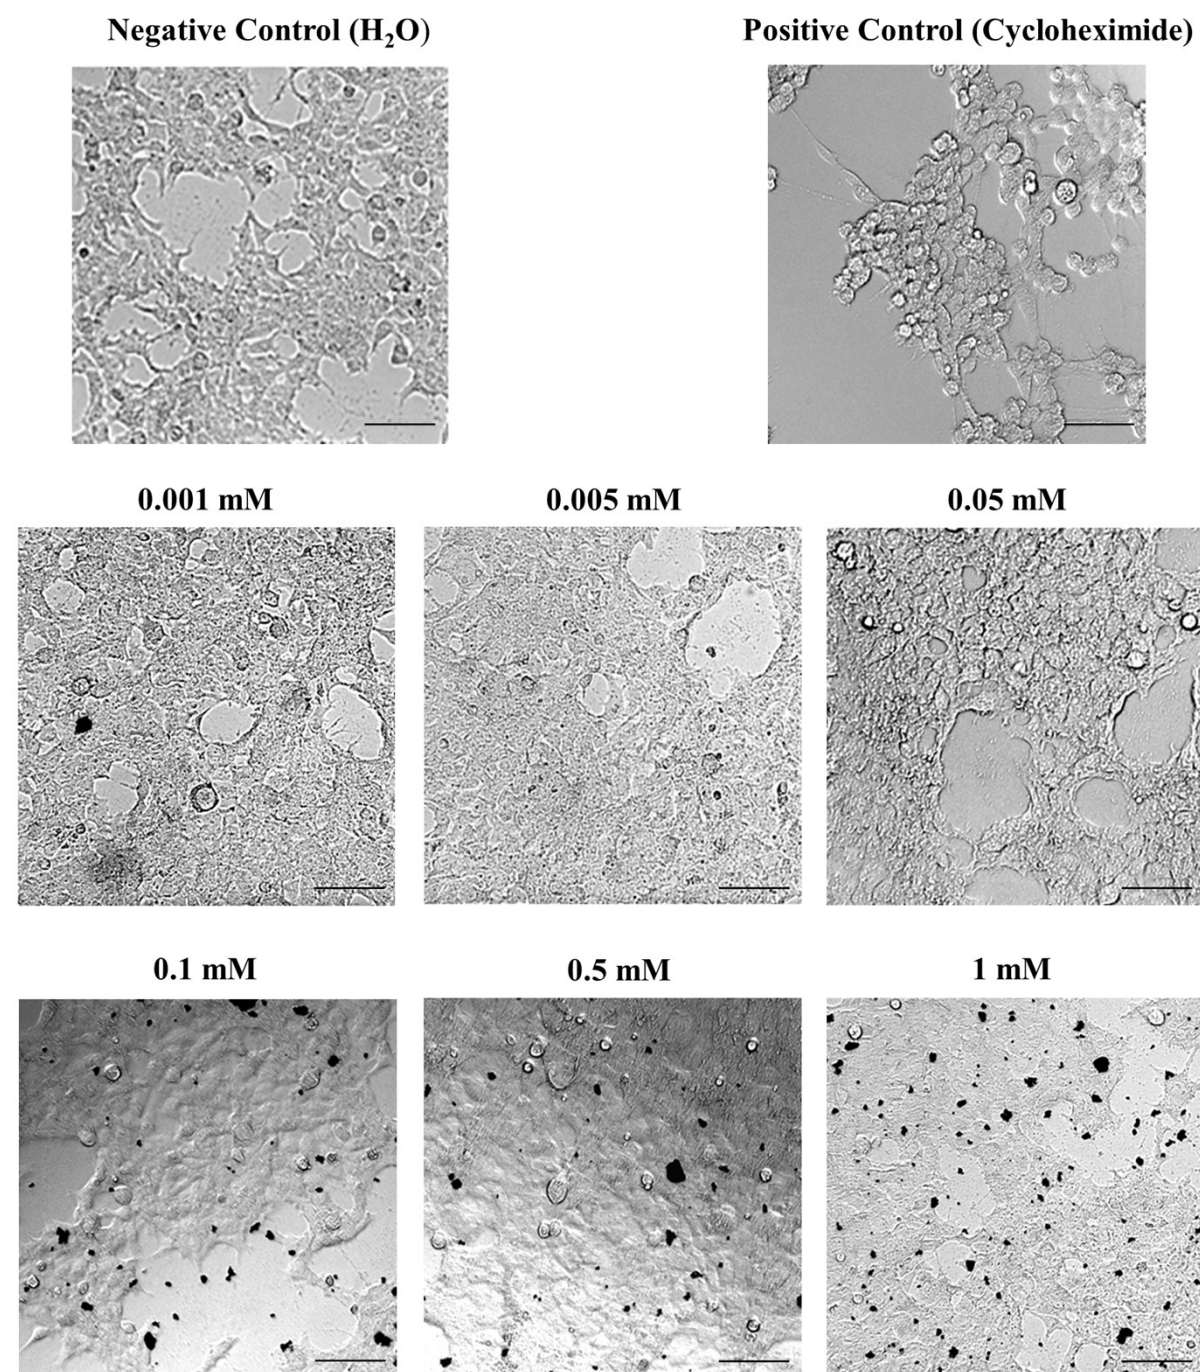

**Fig. S5** Interaction of PEG stabilized Janus nanoparticles with HEK 293 cell line (Scale bar = 50  $\mu$ m)



## 5.2 Interaction with HEPA 1-6 cell line

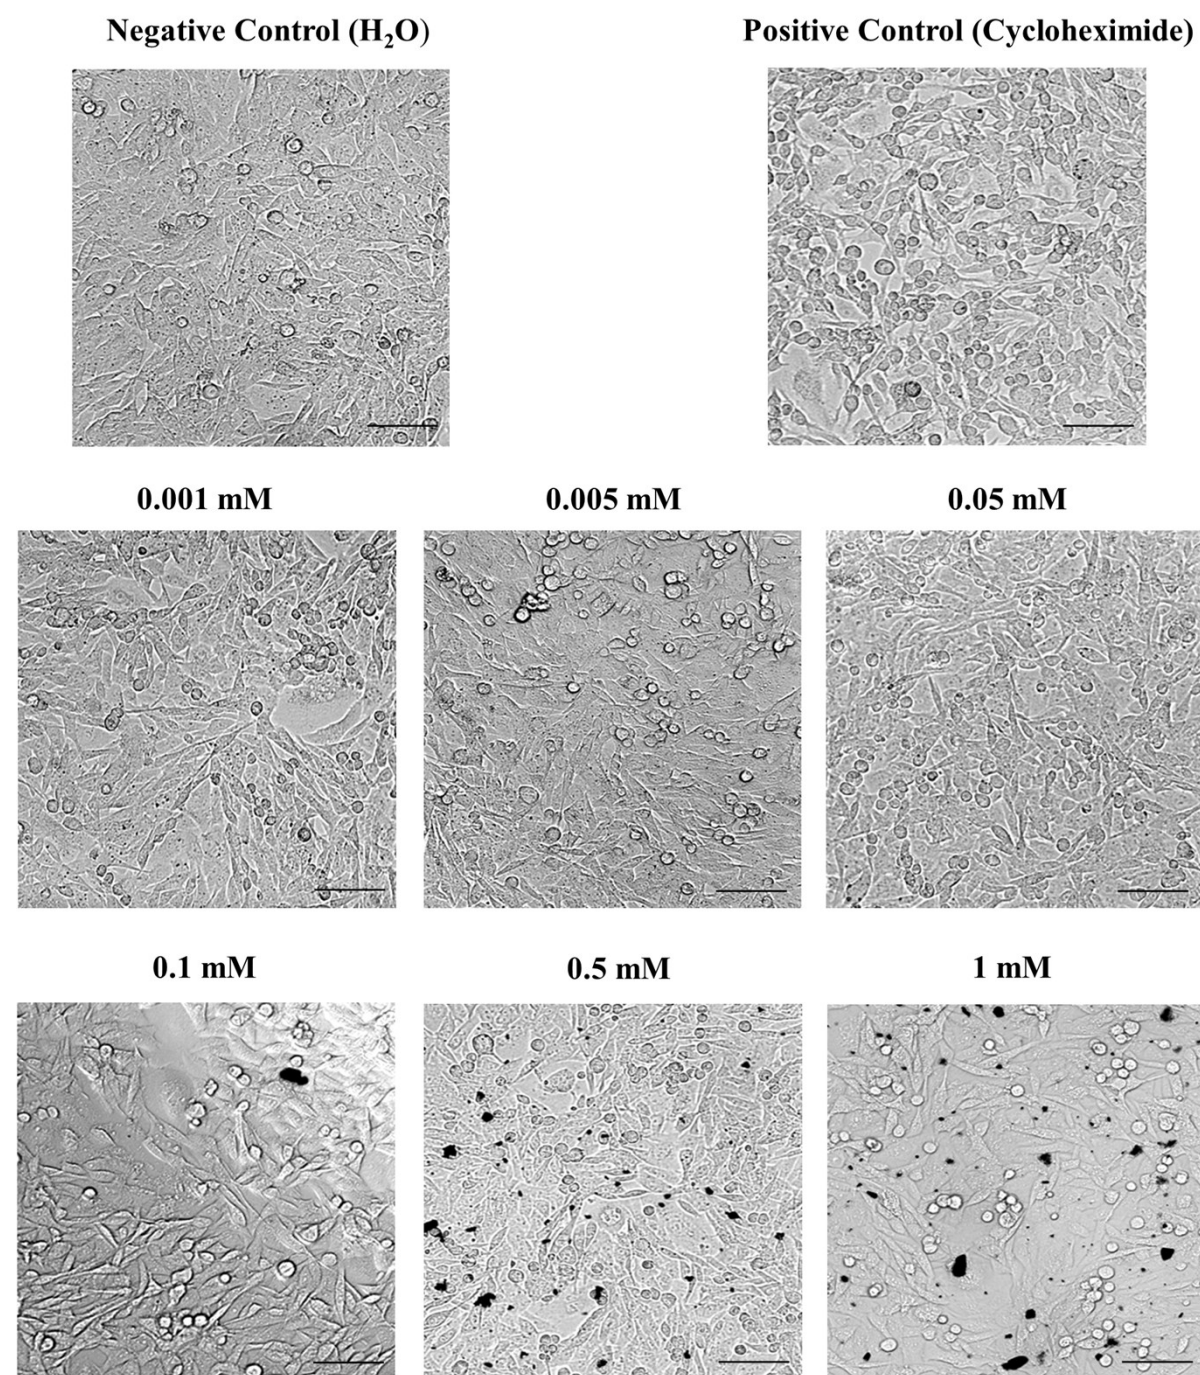

**Fig. S6** Interaction of PEG stabilized Janus nanoparticles with HEPA 1-6 cell line (Scale bar = 50  $\mu$ m)

## References

- 1 W. H. Xu, L. Wang, J. Wang, G. P. Sheng, J. H. Liu, H. Q. Yu and X. J. Huang, *CrystEngComm*, 2013, **15**, 7895–7903.
- 2 S. R. Li, Y. Sun, S. Y. Ge, Y. Qiao, Y. M. Chen, I. Lieberwirth, Y. Yu and C. H. Chen, *Chem. Eng. J.*, 2012, **192**, 226–231.
- 3 R. Murugan and S. Ramakrishna, *Biomaterials*, 2004, **25**, 3829–3835.
